# Supplementary material for: Synthesis, physical properties and ion recognition of a novel larger heteroacene with eleven linearly-fused rings and two different types of heteroatom
Source: Royal Society of Chemistry journal article supplement (doi:10.1039/c5ra17899a), 2015-01-01
Supplement: c5ra17899a1.pdf [file c5ra17899a1.pdf]

## Supporting Information

### **Synthesis, physical properties and ion recognition of a novel larger heteroacene with eleven linearly-fused rings and two different types of heteroatoms**

**Pei-Yang Gu,<sup>a</sup> Junkuo Gao,<sup>b</sup> Chengyuan Wang,<sup>a</sup> and Qichun Zhang<sup>\*a,c</sup>**

*<sup>a</sup> School of Materials Science and Engineering, Nanyang Technological University, Singapore 639798, Singapore.*

*\* Correspondence to Q. Zhang, E-mail: qc Zhang@ntu.edu.sg*

*<sup>b</sup> The Key Laboratory of Advanced Textile Materials and Manufacturing Technology of Ministry of Education, College of Materials and Textiles, Zhejiang Sci-Tech University, Hangzhou 310018, China*

*<sup>c</sup> Division of Chemistry and Biological Chemistry, School of Physical and Mathematical Sciences, Nanyang Technological University, Singapore 637371, Singapore*

## Contents

**Figure S1**  $^1\text{H}$  NMR spectrum of compound **8N8O** in  $\text{CF}_3\text{COOD}$  (TFA).

**Figure S2**  $^{13}\text{C}$  NMR spectrum of compound **8N8O** in TFA.

**Figure S3** HRMS spectrum of compound **8N8O**.

**Figure S4** IR spectrum of compound **8N8O**.

**Figure S5** Normalized emission of compound **8N8O** in NMP solution with different concentration ( $\lambda_{\text{ex}} = 427 \text{ nm}$ ).

**Figure S6** TGA curve of compound **8N8O** with a heating rate of  $10 \text{ }^\circ\text{C min}^{-1}$  under  $\text{N}_2$  atmosphere.

**Figure S7** Cyclic voltammogram of compound **8N8O** a  $0.1\text{M}$  solution of  $\text{TBAPF}_6$  in NMP solution. The scan rate:  $100 \text{ mV s}^{-1}$ .

**Figure S8** DFT molecular simulation results: HOMO and LUMO of compound **8N8O**.

**Figure S9** UV/Vis absorption spectra of NMP solutions of compound **8N8O** ( $10^{-5} \text{ mol L}^{-1}$ ) in the absence (blank) and presence of mixed anions without or with iodide ( $2 \times 10^{-4} \text{ mol L}^{-1}$ ).

**Figure S10** Cyclic voltammogram of the ferrocene standard in NMP solution at the scan rate of  $100 \text{ mV S}^{-1}$ .

## Experimental

### Materials

10% Pd/C and hydrazine monohydrate were purchased from Alfa Aesar. 2,5-Dihydroxy-1,4-benzoquinone was purchased from Sigma-Aldrich. 1,2-Bis(decyloxy)-4,5-diaminobenzene was synthesized according to a reported procedure. Other chemicals and solvents were used directly without further purification.

Cyclic voltammetry measurements were carried out on a CHI 604E electrochemical analyzer. Glassy carbon (diameter: 1.6 mm; area 0.02 cm<sup>2</sup>) was used as a working electrode, platinum wires were used as counter electrode and reference electrode, respectively. Fc<sup>+</sup>/Fc was used as an internal standard. Potentials were recorded versus Fc<sup>+</sup>/Fc in a solution of anhydrous *N*-methyl-2-pyrrolidone (NMP) with 0.1M tetrabutylammonium hexafluorophosphate (TBAPF<sub>6</sub>) as a supporting electrolyte at a scan rate of 100 mV s<sup>-1</sup>.

### Experimental Section

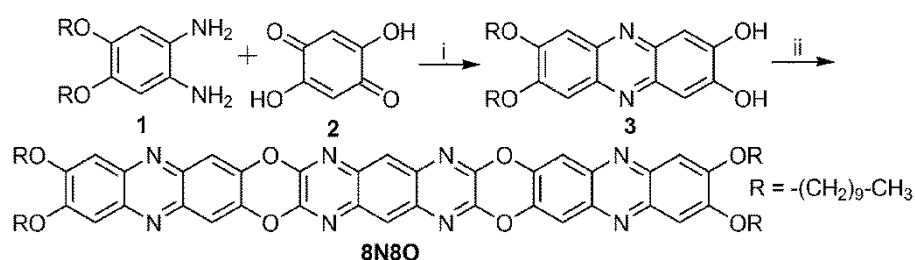

Scheme 1. Synthetic route of : (i) CH<sub>3</sub>CH<sub>2</sub>OH, N<sub>2</sub>, reflux, 62%; (ii) 10 equiv CsF, 0.33 equiv 2,3,7,8-tetrachloro-1,4,6,9-tetrazaanthracene, DMF, 80 °C, 10 %.

### Synthesis of 7,8-bis(decyloxy)phenazine-2,3-diol (3)

A mixture of 1,2-bis(decyloxy)-4,5-diaminobenzene 1 (840 mg, 2 mmol) and 2,5-dihydroxy-1,4-benzoquinone 2 (308 mg, 2.2 mmol) in refluxing ethanol (v = 100 ml) was stirred 24 h under N<sub>2</sub> atmosphere. The mixture was allowed to cool down to ambient temperature and the obtained precipitate was isolated by filtration and washed with cold methanol and small ethyl ether affording 3 as a red solid (650 mg, 1.24 mmol, yield: 62 %)

$^1\text{H}$  NMR (300 MHz,  $\text{DMSO-}d_6$ )  $\delta$  10.48 (s, 2H), 7.29 (s, 2H), 7.22 (s, 2H), 4.16 (t,  $J$  = 6.0 Hz, 4H), 1.89 – 1.69 (m, 4H), 1.59 – 1.42 (m, 4H), 1.42 – 1.16 (m, 24H), 0.84 (t,  $J$  = 5.6 Hz, 6H).

**Synthesis of 2,3,15,16-tetradecyloxy-5,8,10,13,18,21,23,26-octaaza-7,11,20,24-tetraoxohendecacene (8N8O)**

A mixture of 7,8-bis(decyloxy)phenazine-2,3-diol **3** (1.57 g, 3 mmol) and CsF (4.53 g, 30 mmol) in 50 mL anhydrous *N,N*-dimethylformamide (DMF) was stirred 2 h under  $\text{N}_2$  atmosphere. 2,3,7,8-tetrachloro-1,4,6,9-tetraazaanthracene **4** (320 mg, 1 mmol) was added in 50 mL of anhydrous DMF and the mixture was heated at 80 °C for 3 days. The mixture was allowed to cool down to ambient temperature before pouring into deionised water (500 mL). The obtained precipitate was isolated by filtration and washed with cold ethanol, tetrahydrofuran and small ethyl ether affording compound **8N8O** (122 mg, 0.1 mmol, yield: 10 %).

$^1\text{H}$  NMR (400 MHz, TFA)  $\delta$  8.71 (s, 2H), 8.25 (s, 4H), 7.67 (s, 4H), 4.46 (t, 8H), 2.04 (m, 8H), 1.64 (m, 8H), 1.39 (m, 48H), 0.86 (t, 12H).

$^{13}\text{C}$  NMR (400 MHz, TFA)  $\delta$  160.69, 144.73, 144.28, 138.84, 137.76, 132.73, 123.81, 100.07, 71.82, 31.43, 29.03, 28.99, 28.82, 28.66, 27.85, 25.40, 21.98, 12.25

HR-MS (ESI, the isotopomer with one  $^{15}\text{N}$  atom): Calcd for  $\text{C}_{74}\text{H}_{95}\text{O}_8\text{N}_8$ : 1224.7243; Found: 1224.7603.

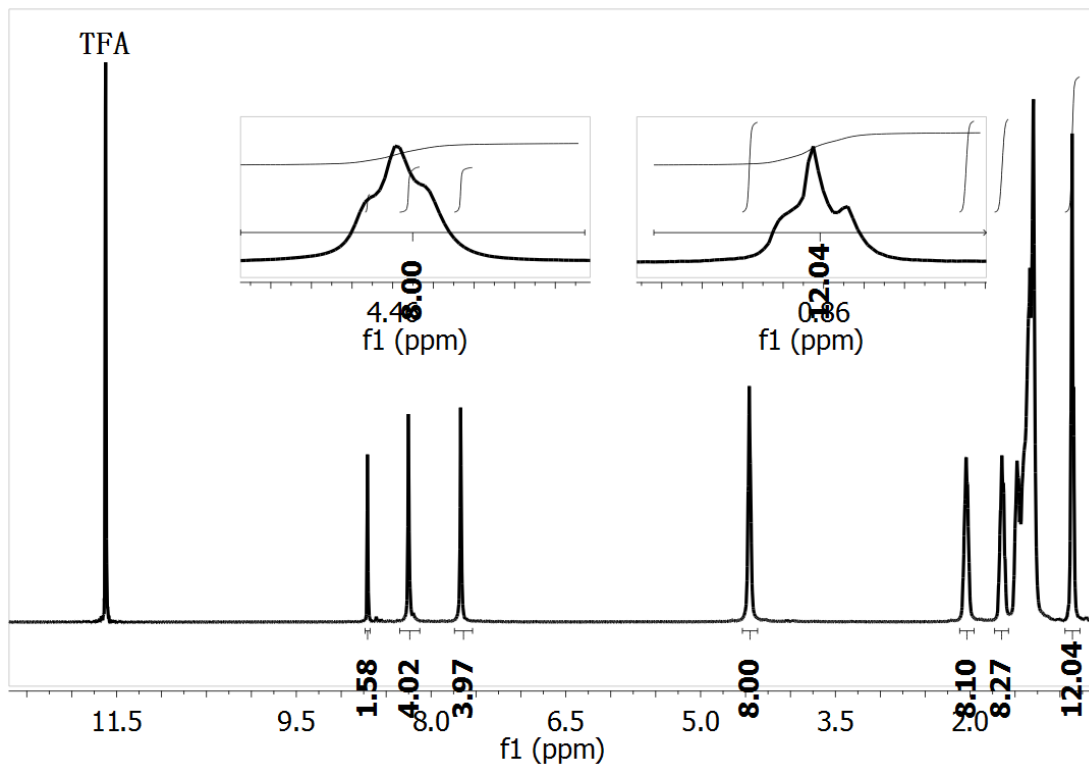

Figure S1  $^1\text{H}$  NMR spectrum of compound **8N8O** in  $\text{CF}_3\text{COOD}$  (TFA).

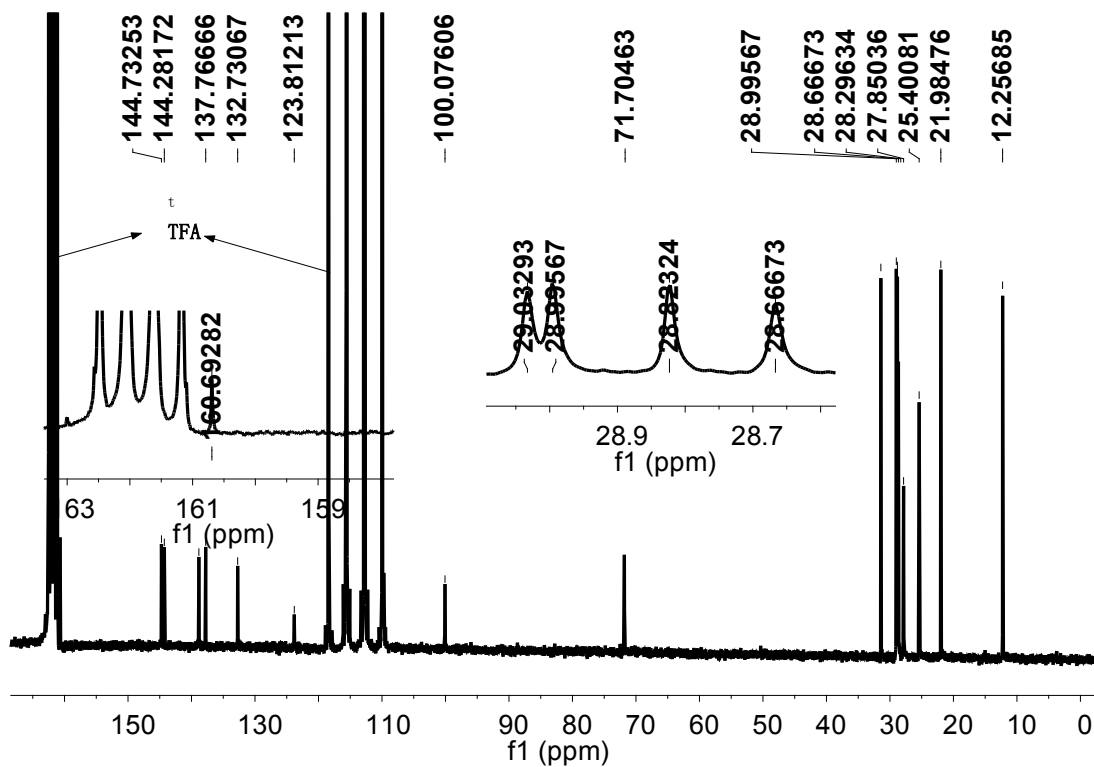

Figure S2  $^{13}\text{C}$  NMR spectrum of compound **8N8O** in TFA.

## Single Mass Analysis

Tolerance = 500.0 PPM / DBE: min = -1.5, max = 50.0  
Element prediction: Off  
Number of isotope peaks used for i-FIT = 3

Monoisotopic Mass, Even Electron Ions

1 formula(e) evaluated with 1 results within limits (up to 3 closest results for each mass)

Elements Used:

C: 73-74 H: 94-95 O: 7-8 14N: 1-8 15N: 1-1

C74H95N8O8  
G-6 1 (0.045)1: TOF MS ES+  
1.01e+000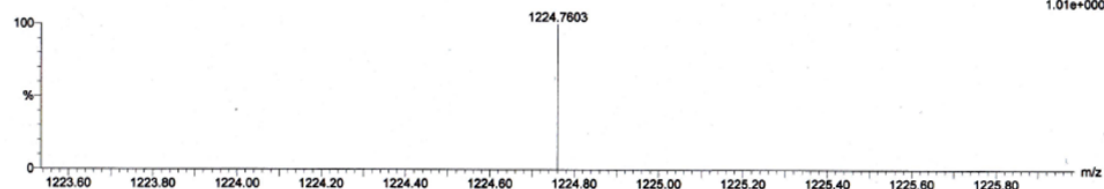

| Mass      | Calc. Mass | mDa  | PPM  | DBE  | i-FIT | i-FIT (Norm) | Formula             |
|-----------|------------|------|------|------|-------|--------------|---------------------|
| 1224.7603 | 1224.7243  | 36.0 | 29.4 | 31.5 | 11.1  | 0.0          | C74 H95 O8 14N7 15N |

Figure S3 HRMS spectrum of compound 8N8O.

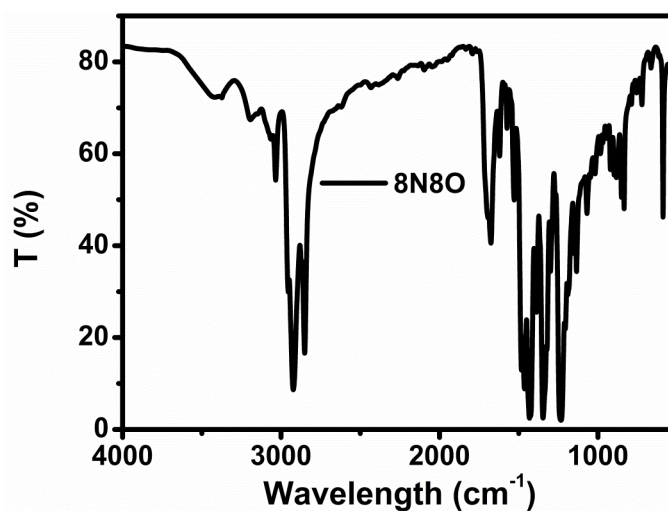

Figure S4 IR spectrum of compound 8N8O.

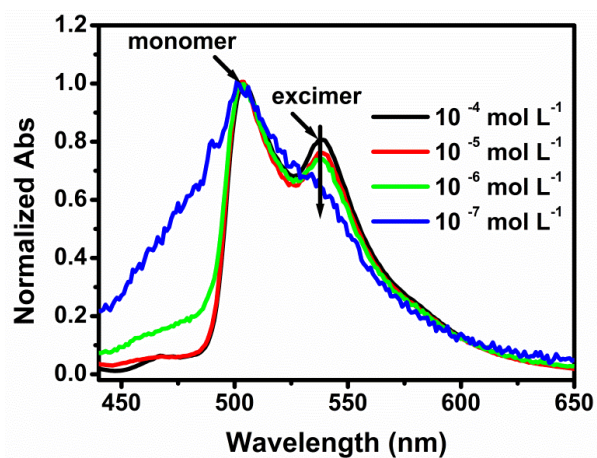Figure S5 Normalized emission of compound 8N8O in NMP solution with different concentration ( $\lambda_{\text{ex}} = 427 \text{ nm}$ ).

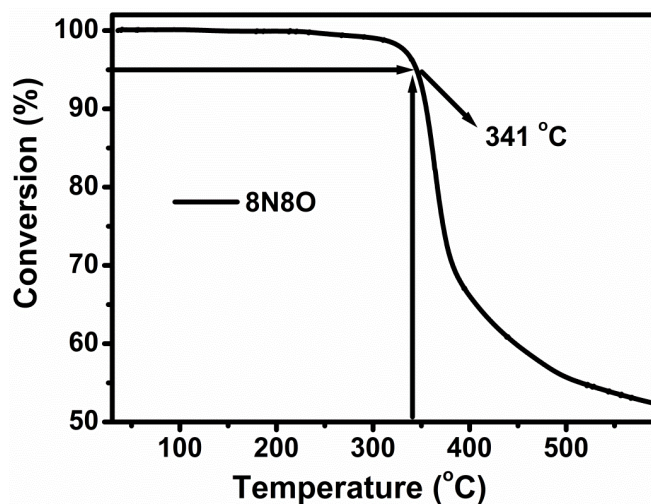

**Figure S6** TGA curve of compound **8N8O** with a heating rate of  $10\text{ }^{\circ}\text{C min}^{-1}$  under  $\text{N}_2$  atmosphere.

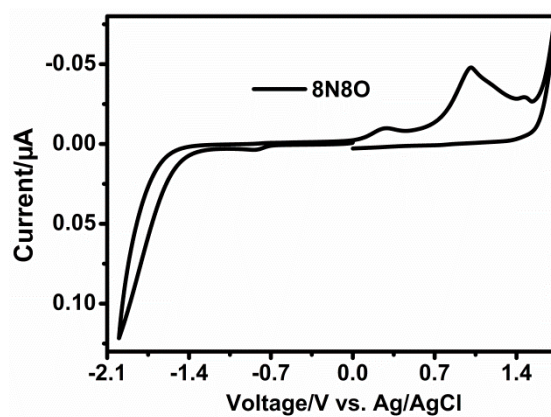

**Figure S7** Cyclic voltammogram of compound **8N8O** a 0.1M solution of  $\text{TBAPF}_6$  in NMP solution. The scan rate:  $100\text{ mV s}^{-1}$ .

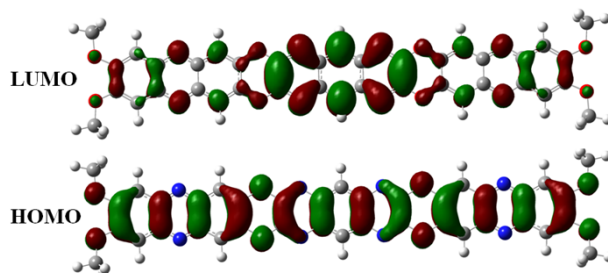

**Figure S8** DFT molecular simulation results: HOMO and LUMO of compound **8N8O**.

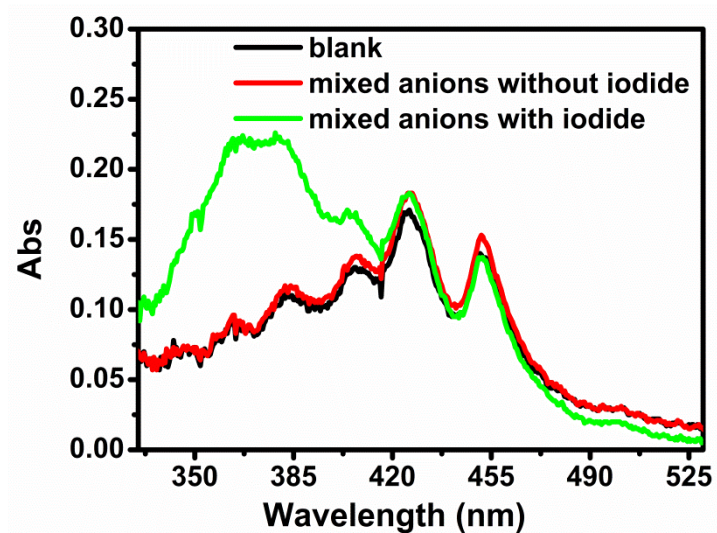

**Figure S9** UV/Vis absorption spectra of NMP solutions of compound **8N8O** ( $10^{-5}$  mol L $^{-1}$ ) in the absence (blank) and presence of mixed anions without or with iodide ( $2 \times 10^{-4}$  mol L $^{-1}$ ).

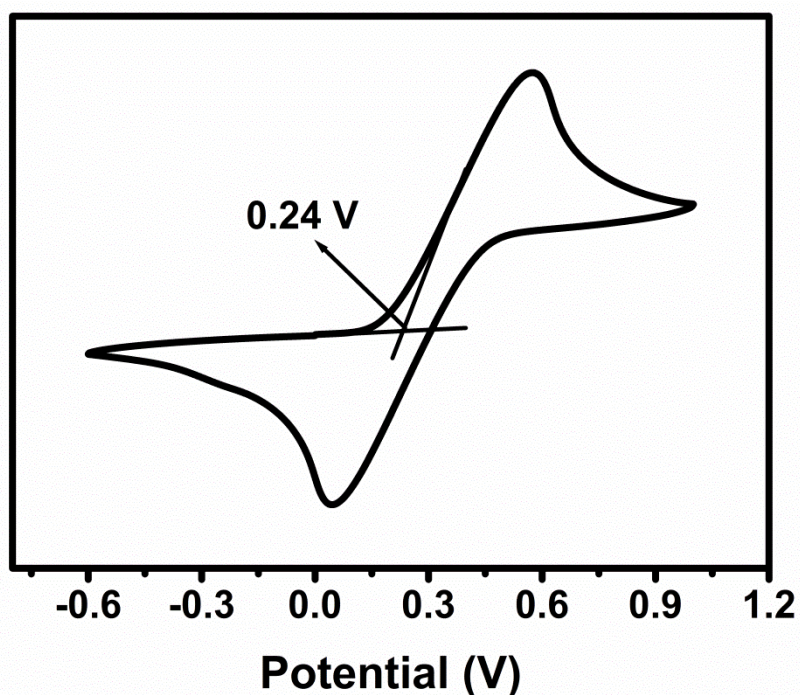

**Figure S10** Cyclic voltammogram of the ferrocene standard in NMP solution at the scan rate of 100 mV S $^{-1}$ .
